## Ambient temperature and genotype differentially affect developmental and

### 2 phenotypic plasticity in *Arabidopsis thaliana*

4 Carla Ibañez<sup>1,2†</sup>, Yvonne Poeschl<sup>3,4†</sup>, Tom Peterson<sup>2</sup>, Julia Bellstädt<sup>1,2</sup>, Kathrin Denk<sup>1,2</sup>,  
Andreas Gogol-Döring<sup>3,4</sup>, Marcel Quint<sup>1,2</sup> and Carolin Delker<sup>1,2\*</sup>

<sup>1</sup>Institute of Agricultural and Nutritional Sciences, Martin Luther University Halle-  
8 Wittenberg, Betty-Heimann-Str. 5 , 06120 Halle (Saale), Germany

<sup>2</sup>Department of Molecular Signal Processing, Leibniz Institute of Plant Biochemistry,  
10 Weinberg 3, 06120 Halle (Saale), Germany

<sup>3</sup>German Centre for Integrative Biodiversity Research (iDiv) Halle-Jena-Leipzig,  
12 Deutscher Platz 5e, 04103 Leipzig, Germany

<sup>4</sup>Institute of Computer Science, Martin Luther University Halle-Wittenberg, Von-  
14 Seckendorff-Platz 1, 06099 Halle (Saale), Germany

16 [cibanez@ipb-halle.de](mailto:cibanez@ipb-halle.de)

[yvonne.poeschl@idiv.de](mailto:yvonne.poeschl@idiv.de)

18 [peterston.tom@gmx.de](mailto:peterston.tom@gmx.de)

[julia.bellstaedt@ipb-halle.de](mailto:julia.bellstaedt@ipb-halle.de)

20 [kathrin.denk@landw.uni-halle.de](mailto:kathrin.denk@landw.uni-halle.de)

[gogol-doering@idiv.de](mailto:gogol-doering@idiv.de)

22 [marcel.quint@landw.uni-halle.de](mailto:marcel.quint@landw.uni-halle.de)

24 † Co-first authors

\* Author for correspondence:

26 [carolin.delker@landw.uni-halle.de](mailto:carolin.delker@landw.uni-halle.de)

Tel.: +49 345 5522 629

28

30 **Abstract**

- 32 • **Background:** Global increase in ambient temperatures constitute a significant  
34 challenge to wild and cultivated plant species. Forward genetic analyses of  
36 individual temperature-responsive traits have resulted in the identification of  
several signaling and response components. However, a comprehensive  
knowledge about temperature sensitivity of different developmental stages and  
the contribution of natural variation is still scarce and fragmented at best.
- 38 • **Results:** Here, we systematically analyze thermomorphogenesis throughout a  
40 complete life cycle in ten natural *Arabidopsis thaliana* accessions grown in  
four different temperatures ranging from 16 to 28 °C. We used  $Q_{10}$ , GxE,  
42 phenotypic divergence and correlation analyses to assess temperature  
sensitivity and genotype effects of more than 30 morphometric and  
developmental traits representing five phenotype classes. We found that  
44 genotype and temperature differentially affected plant growth and  
development with varying strengths. Furthermore, overall correlations among  
phenotypic temperature responses was relatively low which seems to be  
46 caused by differential capacities for temperature adaptations of individual  
accessions.
- 48 • **Conclusion:** Genotype-specific temperature responses may be attractive  
50 targets for future forward genetic approaches and accession-specific  
thermomorphogenesis maps may aid the assessment of functional relevance  
of known and novel regulatory components.

52

54 **Key Words**

Arabidopsis, natural variation, phenotypic plasticity, thermomorphogenesis,  
56 phenotyping

58 **Background**

Recurrent changes in ambient temperature provide plants with essential information  
60 about time of day and seasons. Yet, even small changes in mean ambient  
temperatures can profoundly affect plant growth and development resulting in  
62 thermomorphogenic changes of plant architecture [1]. In crops like rice, a season-  
specific increase in the mean minimum temperature of 1 °C results in a ~10 %  
64 reduction in grain yield [2]. Likewise, up to 10 % of the yield stagnation of wheat and  
barley in Europe over the past two decades can be attributed to climate change [3].  
66 Current projections indicate that mean global air temperatures will increase up to 4.8  
°C by the end of the century [4,5]. Global warming will thus have significant  
68 implications on biodiversity and future food security.

Elevated ambient temperatures affect of course also wild species in their natural  
70 habitats. Long-term phenology studies of diverse plant populations have revealed an  
advance in first and peak flowering and alterations in the total length of flowering  
72 times [6,7]. Furthermore, estimates project that temperature effects alone will account  
for the extinction of up to one-third of all European plant species [8]. As the impact of  
74 changes in ambient temperature on crop plants and natural habitats emerge, a  
comprehensive understanding of temperature-mediated growth responses  
76 throughout development becomes paramount.

Our present knowledge on molecular responses to ambient temperature changes

78 has significantly progressed by studies in *Arabidopsis thaliana*. Model  
thermomorphogenesis phenotypes such as hypocotyl elongation [9], hyponastic leaf  
80 movement [10], and alterations in flowering time have served in various genetic  
approaches to identify relevant molecular players (reviewed in [1]. In this regard,  
82 exploiting naturally occurring genetic variation in these model traits has served as a  
valuable tool [11–16]. Primary signaling genes/proteins seem to function in response  
84 to both temperature and light stimuli. Prominent members of this network are  
photoreceptors such as CRYPTOCHROME 1 (CRY1 [17]), or the recently identified  
86 thermosensor PHYTOCHROME B [18,19]. Further components include  
PHYTOCHROME INTERACTING FACTOR 4 (PIF4, [20–22], DE-ETIOLATED 1,  
88 CONSTITUTIVELY PHOTOMORPHOGENIC 1, ELONGATED-HYPOCOTYL 5 [23–  
25] and EARLY FLOWERING 3 (ELF3); the latter as a component of the circadian  
90 clock [12,13].

The investigation of signaling pathways that translate temperature stimuli into  
92 qualitative and quantitative developmental responses has so far largely been limited  
to either seedling development or flowering time. However, it seems likely that  
94 temperature responses in different phases of development either require variations of  
a canonical signaling pathway or involve at least partially specific signaling  
96 components. To enable the dissection of thermomorphogenic signaling at different  
developmental stages, it is vital to gather a comprehensive understanding of the  
98 diversity of temperature reactions throughout plant development.

According to basic principles of thermodynamics, temperature-induced changes in  
100 free energy will affect the rates of biochemical reactions. As these effects should  
occur generally, albeit to different magnitudes, non-selective phenotypic responses

102 can be expected to occur robustly and rather independently of genetic variation.  
Such traits may therefore be indicative of passive, thermodynamic effects on a  
104 multitude of processes. Alternatively, robust temperature responses may be due to  
thermodynamic effects on highly conserved signaling elements. These may be  
106 attractive targets for classic mutagenesis screens to identify the relevant regulatory  
components. In contrast, natural variation in thermomorphogenesis traits is likely the  
108 consequence of variability in one or several specific signaling or response  
components. It may be addressed by quantitative genetic approaches to identify  
110 regulators that contribute to variable temperature responses. Such genes may  
represent attractive candidates for targeted breeding approaches.

112 In this study we aim to (i) provide a map of developmental phenotypes that are  
sensitive to ambient temperature effects throughout a life cycle in the model  
114 organism *A. thaliana*, (ii) identify traits that are robustly affected by temperature with  
little variation among different accessions, and ask (iii) which traits are affected  
116 differentially by different genotypes and thus show natural variation in temperature  
responses.

118 To realize this, we performed a profiling of numerous developmental and  
morphological traits which can be sorted into five main categories: juvenile vegetative  
120 stage, adult vegetative stage, reproductive stage, morphometric parameters and  
yield-associated traits. Phenotypes were analyzed in a subset of ten *A. thaliana*  
122 accessions which were grown at 16, 20, 24, and 28 °C in climate-controlled  
environments. Knowing that even a small randomly selected set of *A. thaliana*  
124 accessions covers a wide spectrum of genetic diversity [26], we chose to analyze  
commonly used lab accessions such as Col-0, Ler-1 and Ws-2, accessions known to

126 react hypersensitively to elevated temperature (e.g., Rrs-7, [24,27], and parental  
lines of available mapping populations such as Bay-0, Sha, and Cvi-0.

128 In addition to a meta-analysis of the phenotypic data, we provide accession-specific  
developmental reference maps of temperature responses that can serve as  
130 resources for future experimental approaches in the analysis of ambient temperature  
responses in *A. thaliana*.

132

## Materials and Methods

### 134 *Plant material and growth conditions*

Phenotypic parameters (Fig. 1) were assessed in *A. thaliana* accessions that were  
136 obtained from the Nottingham Arabidopsis Stock Centre [28]. Morphological markers  
and time points of analyses are described in Additional file 1. Detailed information on  
138 stock numbers and geographic origin of Arabidopsis accessions are listed in  
Additional file 2. For seedling stage analyses, surface-sterilized seeds were stratified  
140 for 3 days in deionized water at 4 °C and subsequently placed on *A. thaliana* solution  
(ATS) nutrient medium [29]. Seeds were germinated and cultivated in climate-  
142 controlled growth cabinets (Percival, AR66-L2) at constant temperatures of 16, 20, 24  
or 28 °C under long day photoperiods (16h light/8h dark) and a photosynthetically  
144 active fluence rate (PAR) of 90  $\mu\text{mol}\cdot\text{m}^{-2}\cdot\text{sec}^{-1}$  of cool white fluorescent lamps. We  
refrained from including a vernalization step because the primary focus of this study  
146 was to record morphology and development in response to different constant ambient  
temperature conditions.

148 Germination rates were assessed daily and hypocotyl, root length, and petiole angles  
were measured in 7 days old seedlings ( $n > 15$ ) with ImageJ [30] and Root Detection  
150 [31].

All other analyses were performed on soil-grown plants cultivated in growth cabinets  
152 (Percival) at a PAR of  $140 \mu\text{mol}\cdot\text{m}^{-2}\cdot\text{sec}^{-1}$  and long day photoperiods (16h light/8h  
dark). After imbibition for 3 days at  $4^\circ\text{C}$ , seeds were grown in individual  $5 \times 5$  cm  
154 pots, which were randomized twice a week to minimize position effects. Relative  
humidity of growth cabinets was maintained at 70 % and plants were watered by  
156 subirrigation. Plants ( $n > 15$ ) were photographed daily for subsequent determination  
of phenotypic parameters (leaf number, rosette area and petiole length) using Image  
158 J (<http://imagej.nih.gov/ij/>). Determination of developmental progression largely  
followed the stages defined in Boyes et al. [32]. The vegetative growth period was  
160 divided in a juvenile phase (germination to initiation of the fifth rosette leaf) and an  
adult vegetative stage (initiation of the sixth rosette leaf to floral transition). At  
162 transition to the reproductive growth phase, the number of leaves was determined by  
manual counting in addition to recording the number of days after germination.  
164 Spectrophotometric determination of chlorophyll content was performed as described  
in [33].

166

### *Data analysis*

168 Visualization and statistical analyses of the data were performed using the software  
R [34]. Box plots were generated using the *boxplot* function contained in the graphics  
170 package. Heat maps were generated using the *heatmap.2* function contained in the  
gplots package.  
172 ANOVAs for a single factor (either accession or temperature) and Tukey's 'Honest  
Significant Difference' test as *post hoc* test were performed using the *anova* and  
174 *TukeyHSD* function, respectively, which are both contained in the R stats package.

Variation in phenotype expression was analyzed by 2-way ANOVA according to  
176 Nicotra [35] and Whitman and Agrawal [36] to test each phenotype for a significant  
effect of genotype ( $G$ , accession) or environment ( $E$ , temperature), and a significant  
178 genotype by environment interaction ( $G \times E$ ). Reaction norms for each analysis are  
shown in Additional file 3.

180

### $Q_{10}$ temperature coefficient

182 The  $Q_{10}$  temperature coefficient was calculated according to Loveys [37]

$$Q_{10} = \left( \frac{P_w}{P_c} \right)^{\frac{10}{T_w - T_c}}$$

184 where  $P_w$  and  $P_c$  are the trait values at the warmer and cooler temperatures,  
respectively.  $T_w$  and  $T_c$  represent the corresponding temperatures in °C. We  
186 computed the geometric mean of the six  $Q_{10}$  values of all pairwise temperature  
combinations for each phenotypic trait to avoid artifacts caused by differential  
188 reaction norms/response shapes.

### 190 Index of phenotypic divergence ( $P_{st}$ )

Calculation of the index of phenotypic divergence ( $P_{st}$  [38,39]) as a measure to  
192 quantify variation in each phenotypic trait was calculated as previously described by  
Storz [38] as

$$194 \quad P_{st} = \frac{\sigma_b^2}{\sigma_b^2 + 2\sigma_w^2}$$

where  $\sigma_b^2$  is the variance between populations, and  $\sigma_w^2$  is the variance within  
196 populations. The ANOVA framework was used to partition the variances to get



unbiased estimates for  $\sigma_b^2$  and  $\sigma_w^2$ .

198 Using the two factorial design, two types of indices of phenotypic variation of a  
trait/phenotype were considered separately. The index of phenotypic divergence for  
200 genotypes ( $P_{st}^{gen}$ ) at a defined temperature level can be computed to measure the  
effect/impact of the genotype on the variation whereas the index of phenotypic  
202 divergence for temperatures ( $P_{st}^{temp}$ ) provides a measure for the effect of  
temperature on the observed variation for individual genotypes.

204

#### *Principal component analysis (PCA)*

206 Arithmetic means for each genotype-temperature pair were computed except for six  
traits (germination, 13 rosette leaves, 14 rosette leaves, silique production,  
208 chlorophyll content (a+b), and foliar surface) due to too many missing values. The  
remaining 28 traits contained at most eight missing values (randomly  
210 distributed).which were replaced per trait by the arithmetic mean of the respective  
trait values. PCA was performed using the *prcomp* function contained in the R stats  
212 package. Due to the different units and scales of the traits the data was not only to  
centered but also to scaled by *prcomp*.

214

#### *Pairwise correlation analysis of traits*

216 Trait values for rosette leaf traits were summarized by arithmetic means to trait  
groups labeled *Juvenile vegetative stage (2-5 rosette leaves)* and *Adult vegetative*  
218 *stage (6-14 rosette leaves)*, respectively. Similarly, *Inflorescence emergence*,  
*Flowering time\_days* and *Flowering time\_first flower* were combined to form the trait  
220 group *Flowering time (days)*. Spearman correlation coefficients were computed using

the R stats package. Additionally, p values for each Spearman correlation coefficient  
222 were computed using the *cor.test* function. P values were subsequently corrected for  
multiple testing using the Benjamini-Hochberg correction implemented in the *multtest*  
224 package.

## 226 **Results**

To assess phenotypic plasticity in a range of ambient temperatures, *A. thaliana* plants  
228 were cultivated in parallel throughout an entire life cycle at four different temperatures  
(16, 20, 24 and 28 °C) under otherwise similar growth conditions (see Materials and  
230 methods for further details). More than 30 morphological and developmental traits  
were recorded representing the following five phenotype classes: juvenile vegetative,  
232 adult vegetative, and reproductive stages as well as morphometric and yield-  
associated phenotypes (Fig. 1 and Additional file 1).

234

### *Temperature responses in the A. thaliana reference accession Col-0*

236 In Col-0, almost all phenotypes analyzed in this study were affected by the cultivation  
in different ambient temperatures. Only seed weight and maximum height remained  
238 constant regardless of the growth temperature (Fig. 2a, Additional file 4). Among the  
temperature-sensitive traits were several growth-associated phenotypes in the  
240 juvenile vegetative stage. Primary root length, hypocotyl and petiole elongation all  
increased with elevated temperatures which concurs with previously published data  
242 [9,10]. As another example, yield-related traits, such as the number of siliques per  
plant and the number of seeds per silique decreased with an increase in ambient  
244 temperature (Fig. 2a).

As reported previously, Col-0 plants showed a decrease in developmental time until  
246 flowering with increasing ambient temperatures [11]. The transition from the  
vegetative to the reproductive phase at 28 °C occurred about 25 days earlier than at  
248 16 °C (Fig. 2a). Similarly, the number of rosette leaves developed at time of bolting  
differed by approximately 26 leaves between 28 °C and 16 °C (Additional file 4b).  
250 The observation that only a very limited number of phenotypes were insensitive to  
cultivation in different temperatures clearly illustrates the fundamental impact of  
252 ambient temperature on plant growth and development.

#### 254 *Natural variation of temperature responses*

To assess whether the observed temperature responses in Col-0 are robust among  
256 *A. thaliana* accessions or which of the responses may be affected by natural  
variation, phenotypic profiling was performed in nine additional *A. thaliana*  
258 accessions parallel to the analysis in Col-0 (Additional files 4-13). Naturally, a panel  
of ten accessions does not comprehensively represent the world-wide gene pool of  
260 *A. thaliana*. However, it can be expected that even 10 randomly chosen natural  
accessions represent ~70 % of the allelic diversity in the *A. thaliana* gene pool [26].  
262 Hence, the general assessment of thermo-responsive development in *A. thaliana* as  
well as the identification and discrimination between traits that generally seem to  
264 exhibit natural variation and those that may be genetically fixed within the gene pool  
is a realistic aim even with a set of 10 selected accessions.

266 To approximate and to compare temperature sensitivity of traits among different  
accessions, we calculated  $Q_{10}$  values for each individual trait and phenotype class for  
268 each analyzed genotype [37]. The  $Q_{10}$  quotient represents the factor by which a trait

value changes if the ambient temperature increases by 10 °C. We calculated  
270 geometric means of all possible pairwise combinations of temperatures to minimize  
effects potentially caused by different response curves and used the  $\log_2 Q_{10}$  for  
272 visualization as to retain high resolution in the presentation of the data.

Similarly to the response observed in Col-0 (Fig. 2), all analyzed genotypes showed  
274 a temperature-induced acceleration of vegetative development as indicated by  
negative  $\log_2 Q_{10}$  values with low variability among accessions (Fig. 3a, b, Additional  
276 files 4-13). Considerably higher variation was observed in  $\log_2 Q_{10}$  values of traits  
related to reproductive stages. As all accessions investigated were principally able to  
278 flower despite the lack of an extended cold period, none of them strictly required a  
vernalization treatment to transition to the reproductive phase. In contrast to the other  
280 accessions, Got-7 and Rrs-7, however, showed a significant delay in flowering time  
with increasing temperature (Fig. 3b). Got-7, for example, did not flower within the  
282 first 90 days of cultivation when grown in 24 or 28 °C. Thus, initiated leaf senescence  
at bolting stage prevented accurate determination of leaf number at the onset of  
284 flowering.

A direct comparison of leaf number and time of development further corroborates a  
286 sudden increase in variation at the transition to flowering (Additional file 14).  
However, at 16 °C and 20 °C several accessions contribute to the overall variability in  
288 the graph, whereas at 24 °C and 28 °C, C24 and Rrs-7 are the main determinants of  
variation due to their massive number of leaves corresponding to an extension of the  
290 vegetative growth phase (Additional file 14). Got-7 likely would increase this variation  
at 24 and 28 °C, but is missing in this representation due to the lack of flowering  
292 transition within 90 days. Here, the lack of vernalization may at least partially be a

significant factor because cold treatment is explicitly recommended to induce earlier  
294 flowering for several Got-7 lines available at NASC/ABRC [40]. Natural variation in  
regulators such as FLM may contribute to this phenotype. However, as all accessions  
296 were able to flower at temperatures of 16 and 20 °C vernalization does not seem to  
be an essential requirement.

298 Taken together, juvenile and adult vegetative development remained highly  
conserved, whereas the reproductive stage and yield-associated traits showed higher  
300 variation between accessions and within individual accession, as indicated by the  
ranges/dimensions of the box plots in Fig. 3a. Here, high variation within a phenotype  
302 class indicates that temperature effects on individual traits within that class are highly  
variable. The strongest variation within accessions was observed for morphometric  
304 phenotypes such as hypocotyl and petiole length. In contrast, a high variation  
between accessions is indicative for differential responses of different genotypes  
306 which was most prominent in reproductive stage traits.

308 The differential variances of  $\log_2 Q_{10}$  values among the two vegetative and the other  
phenotype classes indicated that genotype and environment effects may contribute  
310 differentially to phenotypic plasticity of different traits. We first used a 2-factorial  
ANOVA to assess which phenotypes show significant changes that can be attributed  
312 to genotype (G, accession), environment (E, temperature), and/or GxE interaction.  
Subsequently, we used the variance partitioning approach [38,39,41,42] to dissect  
314 and quantify the extent of the individual genotype and temperature effects on the  
phenotypic variation in more detail.

316

### *Genotype, Environment, and GxE interaction analysis*

318 Each phenotypic trait was subjected to a 2-factorial ANOVA to address which of the  
analyzed factors (G, E, GxE) had significant effects on the trait. Reaction norm plots  
320 for each phenotype are shown in Additional file 3. Each of the analyzed traits showed  
significant effects of genotype, environment (temperature) and GxE interaction  
322 (Additional file 15). Surprisingly, this included all juvenile and adult vegetative stages  
despite their seemingly uniform impression of temperature responses given by the  
324  $Q_{10}$  values (Fig. 3a, b).

To assess genotype and temperature contributions in a more quantitative manner, we  
326 next used a variance partitioning approach [38,39,41,42]. Specifically, we calculated  
the index of phenotypic divergence ( $P_{st}$ , [38]) at each analyzed temperature as a  
328 measure of genotype effects  $P_{st}^{gen}$  on the trait of interest (Additional file 16a). To  
complement this analysis, we also estimated the variation occurring across  
330 temperatures  $P_{st}^{temp}$  for each of the analyzed accessions (Additional file 16b), which  
enabled us to assess the temperature effect for the trait of interest for specific  
332 genotypes.

### 334 *Genotype effects*

The 2-factorial ANOVA design of the GxE interaction analysis has shown that the  
336 genotype significantly affects variation of phenotypic traits. The variance partitioning  
index for genotype effects ( $P_{st}^{gen}$ ) can extend this analysis by providing a  
338 quantitative assessment of the genotype contribution to variation at individual  
temperatures.

340 Individual  $P_{st}^{gen}$  values showed highly variable patterns among the different traits and

phenotype classes (Additional file 16a). Regardless of the individual temperature,  
342 mean genotype effects on developmental timing throughout the vegetative phase  
were generally very low (Fig. 4a), corroborating the impression gained from the  
344 analysis of  $Q_{10}$  values (Fig. 3). However, genotype effects on later stages of adult  
vegetative development seem to increase with higher temperatures (Additional file  
346 16a), which may be the significant effect observed in the ANOVA-based GxE  
interaction assessment.

348 Similarly, strong genotype effects at higher temperatures were also observed for  
reproductive traits. Here,  $P_{st}^{gen}$  values at 16°C were already considerably higher than  
350 for vegetative growth stages and increased further with elevated temperatures  
(Additional file 16a). A contrasting pattern of decreasing genotype effects with an  
352 increase in temperatures was observed for total plant height indicating that here,  
natural variation in growth is higher at lower temperatures. Yield-associated  
354 phenotypes in general showed only low genotype effects on variation, indicating that  
under our experimental conditions variation in trait expression in this category is  
356 primarily affected by temperature (Fig. 4a).

358 Other phenotypes display rather differential or less gradual genotype effects among  
different temperatures. For example, the genotype impact on variation in hypocotyl  
360 and petiole length sharply increases from 24 to 28°C, indicating a certain buffering  
capacity or a threshold for natural variation.

362 In some cases, such as flowering time, a strong genotype effect seems to correlate  
also with a strong general temperature sensitivity as indicated by the high between-  
364 accessions variability in  $Q_{10}$  values (Fig. 4a and Fig. 3b). However, this does not

seem to be a general principle. In case of root length, for example, low genotype  
366 effects were observed (Fig. 4a, b), even though the phenotype in principle was highly  
sensitive to a change in ambient temperature (Fig. 3b).

368

### *Temperature effects*

370 We also used the variance partitioning approach to analyze the extent of the  
significant impact of temperature on phenotypic variation that was detected in the  
372 GxE interaction analysis (Additional file 15). Therefore, we calculated the index for  
temperature effects (  $P_{st}^{temp}$  ) on the variation of phenotypic plasticity across all four  
374 temperatures within each of the ten accessions (Additional file 16b). While the  $P_{st}^{gen}$   
provided information on the genotype effect and thus, the overall natural variation of  
376 trait expression at different temperatures, the  $P_{st}^{temp}$  provides information primarily on  
the temperature-induced variability for each accession individually.

378 The heatmap representation of temperature effects (Additional file 16b) partially  
complements the genotype effect results. For example, variation in the timing of  
380 vegetative development was highly affected by temperature (high  $P_{st}^{temp}$  ), whereas

$P_{st}^{gen}$  values were generally low (Fig. 4a, Additional file 16a, b). Interestingly,  
382 temperature effects in juvenile vegetative stages seemed to be lower (for seedling  
establishment and 2 rosette leave stage) than in later vegetative stages with the  
384 exception of germination which showed strong temperature effects in most  
accessions.

386 Many traits exhibit highly differential temperature effects among accessions in the  
sense of one accession demonstrating a particularly strong temperature effect on a



388 specific trait, while another accession may show low to no temperature effects (e.g.  
chlorophyll content in Ler-1 vs. Bay-0). This is particularly obvious for yield-related  
390 traits such as total number of seeds per plant and silique as well as silique length.  
Here, temperature effects on phenotype variation were low for Col-0, C24 and Bay-0,  
392 whereas considerably higher  $P_{st}^{temp}$  values were determined for the other accessions  
(Additional file 16b). Accessions which exhibit strong temperature effects on  
394 phenotypic variation may be interesting candidates for forward genetic approaches to  
identify the contributing molecular regulatory components.

396

#### *Comparison of temperature and genotype effects*

398 As each phenotypic trait has been assigned a value for genotype and temperature  
effects, they can easily be compared to assess which of the two has a stronger  
400 influence on the phenotypic plasticity. To allow a direct comparison of effects, we  
compared mean values for  $P_{st}^{gen}$  across all temperatures and  $P_{st}^{temp}$  across all  
402 accessions (Fig. 4a, b).

Temperature effects on vegetative development showed a high, largely robust impact  
404 with little variance in  $P_{st}^{temp}$  values, whereas genotype effects were generally low  
with diverging variances. Genotype effects peak at the transition to the reproductive  
406 phase and in some morphometric phenotypes. In general, morphometric parameters  
show high temperature and varying genotype effects. Phenotypes associated with  
408 late developmental stages were generally less affected by both factors indicating an  
overall buffering effect. Yet, variances in temperature effects tended to be high here,  
410 which may indicate genotype-specific thresholds for temperature effects (Fig. 4a,

Additional file 16c). A scatter plot representation of mean  $P_{st}^{gen}$  and  $P_{st}^{temp}$  values for  
412 each trait allows further comparison of phenotypes according to the impact of both  
factors (Fig. 4b). While vegetative and reproductive phenotypes form tight clusters,  
414 morphometric phenotypes displayed a heterogenous pattern. In these traits,  
temperature responses seem to be affected by natural variation and may thus serve  
416 as candidate phenotypes for classic or quantitative forward genetic analyses.

Several yield-associated phenotypes such as total number of seeds, seed size and  
418 seed weight showed varying degrees of temperature sensitivity, likely caused by the  
partially distinct temperature effects on individual accessions (Fig.2b, Additional file  
420 17).

The fundamental impact on temperature on the phenotypic responses is also  
422 reflected in the results of the principle component analysis (PCA). The PCA was  
performed on mean-centered and scaled data in order to allow integration of data  
424 with different scaling. PC1 which covered 50% of the observed variation, allowed a  
clear separation of samples via temperature (Fig. 5a). Here, the differentiation  
426 between 16 and 20 °C seems to be higher than the temperature changes from 20 to  
24 °C and 24 to 28°C. PC2 explained ~16% of the variation and separated samples  
428 rather by genotype. Here, Rrs-7 and Got-7 showed a clear divergence from other  
genotypes. Again, this separation is already clear between 16 and 20°C whereas a  
430 further increase in temperature contributed little more to the separation.

#### 432 *Correlation of phenotypic temperature responses*

Finally, we analyzed putative correlations in temperature responses among different  
434 phenotypes to assess whether individual phenotype responses are indicative of

temperature responses in general. As redundancies of individual phenotypes may  
436 bias the analyses several traits were combined in groups for further analyses (e.g.  
rosette development or flowering traits). We used the rank-based Spearman  
438 correlation coefficients for pairwise comparisons of averaged trait (group) values  
among all accessions to account for potential non-linear relationships and minimize  
440 outlier effects. As to be expected from the varying degrees of genotype and  
temperature effects on different traits, phenotypic correlations also varied  
442 considerably. To filter for robust correlations, only significant correlations ( $P < 0.05$ )  
were retained in the analysis (Fig. 5b).

444 High correlations were detected among traits within the vegetative stage of  
development (e.g. juvenile and adult vegetative stage), and among traits within the  
446 reproductive phase (e.g. flowering traits and the onset of silique production). In  
addition, temperature-induced reduction in foliar surface correlated strongly with the  
448 decrease in developmental time in vegetative and reproductive phases. Similarly, the  
reduction in developmental times and foliar surface were moderately correlated to the  
450 effect on several seed-associated traits (Fig. 5b).

Model temperature phenotypes such as petiole and hypocotyl length showed a  
452 positive correlation and were in turn correlated or inversely correlated with several  
other phenotypes or trait groups. However, temperature responses in primary root  
454 length under these experimental conditions showed an even more robust connection  
to many other traits. Mostly, these were inverse correlations with the exception of  
456 other seedling traits which were positively correlated with primary root lengths (Fig.  
5b).

458 Due to the differential genotype effects on variation we also wondered whether

individual genotypes may show different correlation patterns among phenotypic  
460 temperature responses. Calculation of Spearman correlation coefficients for each  
individual accession is based on a maximum of four data points per phenotype or  
462 trait group which generally results in weaker interactions among samples. Thus, the  
P-value threshold was set to 0.1 in the analysis which retained only the strongest  
464 (inverse) correlations. Inspection of the correlation patterns reveals remarkable  
differences among accessions (Fig. 5c, Additional file 18). For instance, petiole  
466 length, angle and primary root length in Bay-0 were all inversely correlated with  
flowering time, plant height and the number of seeds/silique, whereas in Sha, only  
468 hypocotyl lengths showed an inverse correlation with developmental timing in  
vegetative and reproductive stages. Got-7 even showed unique correlation patterns  
470 among early growth responses with inverse correlations among petiole angles and  
hypocotyl and root lengths, respectively (Fig. 5c). In general, the diversity in  
472 correlation patterns may indicate differential capacities for temperature responses  
that result in differential activation or buffering and, thus, in different extents of  
474 physiological temperature impacts. Elucidation of the underlying mechanisms of  
differential temperature responses and adaptations may provide essential tools for  
476 the modulation of crop responses to elevated ambient temperatures.

## 478 **Discussion**

Increased ambient temperatures have previously been shown to affect  
480 thermomorphogenesis for selected “model” phenotypes. A systematic assessment of  
developmental and phenotypic plasticity across a complete life cycle has, to the best  
482 of our knowledge, been lacking so far. This study aims to provide such a solid base of

temperature effects on plants by consecutive profiling of plant growth and  
484 development throughout a life cycle of *A. thaliana* grown in four different ambient  
temperatures. Furthermore, including several distinct *A. thaliana* accessions reduced  
486 potential genotype-specific biases in the data and allowed the analysis of  
temperature and genotype effects on the variation observed in different phenotypic  
488 traits.

All of the 34 analyzed phenotypes were significantly affected by different growth  
490 temperatures, natural variation, and GxE interactions, illustrating the fundamental  
impact of ambient temperature on plant development and the high variability in  
492 responses among genotypes (Additional files 4-13, 15). The variance partitioning  
approach allowed the further dissection of phenotypes based on the extent of  
494 temperature and genotype effects. First, we identified phenotypes that were primarily  
affected by temperature and showed small genotype-induced variation. Second, we  
496 identified phenotypes that additionally or even predominantly showed genotype  
effects on the observed phenotypic variation.

498 Developmental timing of juvenile and adult vegetative growth was significantly  
affected by genotype and temperature (Additional file 15). Yet, temperature was the  
500 dominant factor in the observed variation (Fig. 4a, 5a, Additional file 16). Genotype  
effects, albeit significant, were limited and mostly showed similar accelerations by  
502 increasing temperatures in all analyzed genotypes. This observation may be  
indicative for extensive thermodynamic effects on (conserved) regulatory  
504 mechanisms involved in this process. Indeed, thermomorphogenic responses are  
often speculated to be primarily caused by broad or general effects of free energy  
506 changes on biochemical reactions (e.g. enzyme activities). The validity of the early

proposed temperature coefficient ( $Q_{10}$ ) for plant development was demonstrated for  
508 germination rates and plant respiration [43,44]. The strong temperature effect on the  
acceleration of developmental timing throughout the vegetative phase, which was  
510 only weakly affected by genotypes supports this theory. When adopting the terms of  
“passive” and “active” temperature effects as proposed by [45], timing of vegetative  
512 development would represent a passive temperature response that might be caused  
by thermodynamic effects on metabolic rates and enzyme activities or on highly  
514 conserved signaling/response components.

On the other hand, phenotypes that show a high degree of genotype and  
516 temperature effects might rather be influenced by one or more specific genes that  
contribute to trait expression in a quantitative manner. As such, these phenotypes  
518 would represent “active” temperature effects [45]. However, the involvement of  
specific signaling elements does not necessarily exclude influences via  
520 thermodynamics. In fact, the recently described thermosensing via phyB acts via the  
promotion of phyB  $P_{FR}$  to  $P_R$  conversion in a temperature-promoted manner [18,19].  
522 Natural variation in thermomorphogenic responses could be caused by  
polymorphisms in signaling or response genes ranging from alteration in gene  
524 sequence to expression level polymorphism [46]. As they may provide keys to altered  
temperature responses that could be utilized in specific breeding approaches,  
526 identification of such genes would be of high interest.

In fact, natural allelic variation in the circadian clock components *ELF3* and in the  
528 regulation of *GIGANTEA* have recently been shown to directly affect PIF4-mediated  
hypocotyl elongation in response to elevated temperatures [12,13,47]. Therefore,  
530 PIF4 and PIF4-regulating components could be important targets of adaptation to

growth in higher ambient temperatures. PIF4 and ELF3 have been shown to be  
532 involved in both, temperature-induced hypocotyl elongation and the induction of  
flowering [12,13,20,48]. However, a lack of general correlation among seedling  
534 growth and flowering time responses may indicate that these processes are not  
universally regulated via the same components. Alternatively, the impact of these  
536 signaling components on diverse phenotypes may be more prominent for specific  
alleles which may be reflected by the diversity in correlation patterns among  
538 individual accessions (Fig. 5c, Additional file 18).

In general, the intraspecific diversity in phenotypic changes in response to elevated  
540 ambient temperatures argue against a general explanation of morphological and  
developmental changes due to passive thermodynamic effects.

542 Exploiting natural genetic variation to identify genes that are involved in the  
regulation of temperature effects on specific traits can provide new leads for plant  
544 breeding. The work presented here may inspire new approaches for temperature  
research in non-reference accessions as some temperature responses were much  
546 more pronounced in accessions other than Col-0 (Fig. 3b). Specific approaches will  
depend on the focus on either yield- or biomass-associated traits.

548 In conclusion, our work provides a map that allows the dissection of  
thermomorphogenesis in phenotypic traits that are either robustly affected by  
550 temperature or traits that are differentially affected by temperature among different  
accessions. While robust temperature-sensitive phenotypes might indeed be caused  
552 by thermodynamic acceleration of metabolism or highly conserved signaling events,  
natural genetic variation of temperature responses implicate the relevance of specific  
554 regulatory cascades that can be instrumental to future breeding approaches.

556 **Declarations**

- **Ethics approval and consent to participate**

558 Not applicable

- **Consent for publication**

560 Not applicable

- **Availability of data and material**

562 The datasets analysed during the current study is available from the corresponding author on request.

- **Competing interests**

The authors declare that they have no competing interests

- **Funding**

566 This study was supported by the Leibniz Association and a grant from the  
568 Deutsche Forschungsgemeinschaft to M.Q. (Qu 141/3-1). Y.P. s supported by  
the German Centre for Integrative Biodiversity Research (iDiv) Halle-Jena-  
570 Leipzig, funded by the Deutsche Forschungsgemeinschaft (FZT 118).

- **Authors' contributions**

572 CI, MQ, and CD designed the research and experimental setup. CI, TP, JB  
and KD performed the phenotypic analyses and data collection. CI, YP and  
574 CD analyzed the data. YP, AG-D, and CD designed and performed statistical  
analyses. CI, YP, MQ, and CD interpreted data, prepared figures and wrote  
576 the manuscript.

- **Acknowledgements**

578 Not applicable



580 **References**

1. Quint M, Delker C, Franklin KA, Wigge PA, Halliday KJ, van Zanten M. Molecular and genetic control of plant thermomorphogenesis. *Nat. Plants*. 2016;2:15190.
2. Peng S, Huang J, Sheehy JE, Laza RC, Visperas RM, Zhong X, et al. Rice yields decline with higher night temperature from global warming. *Proc. Natl. Acad. Sci.* 2004;101:9971–5.
3. Moore FC, Lobell DB. The fingerprint of climate trends on European crop yields. *Proc. Natl. Acad. Sci. U. S. A.* 2015;112:2670–5.
4. IPCC. Climate change 2013: The physical science basis. Fifth assessment report. [Internet]. UNEP/WMO; Available from: <http://www.ipcc.ch/report/ar5/wg1/>.
5. Lobell DB, Gourdji SM. The Influence of Climate Change on Global Crop Productivity. *Plant Physiol.* 2012;160:1686–97.
6. Fitter AH, Fitter RSR. Rapid Changes in Flowering Time in British Plants. *Science*. 2002;296:1689–91.
7. CaraDonna PJ, Iler AM, Inouye DW. Shifts in flowering phenology reshape a subalpine plant community. *Proc. Natl. Acad. Sci.* 2014;111:4916–21.
8. Thuiller W, Lavorel S, Araújo MB, Sykes MT, Prentice IC. Climate change threats to plant diversity in Europe. *Proc. Natl. Acad. Sci.* 2005;102:8245–50.
9. Gray WM, Östin A, Sandberg G, Romano CP, Estelle M. High temperature promotes auxin-mediated hypocotyl elongation in Arabidopsis. *Proc. Natl. Acad. Sci.* 1998;95:7197–202.
10. Zanten M van, Voeselek LACJ, Peeters AJM, Millenaar FF. Hormone- and Light-Mediated Regulation of Heat-Induced Differential Petiole Growth in Arabidopsis. *Plant Physiol.* 2009;151:1446–58.
11. Balasubramanian S, Sureshkumar S, Lempe J, Weigel D. Potent Induction of Arabidopsis thaliana Flowering by Elevated Growth Temperature. *PLoS Genet.* 2006;2:e106.
12. Raschke A, Ibañez C, Ullrich KK, Anwer MU, Becker S, Glöckner A, et al. Natural Variants of ELF3 Affect Thermomorphogenesis by Transcriptionally Modulating PIF4-Dependent Auxin Responses. *BMC Plant Biol.* 2015;15:197.
13. Box MS, Huang BE, Domijan M, Jaeger KE, Khattak AK, Yoo SJ, et al. ELF3 Controls Thermoresponsive Growth in Arabidopsis. *Curr. Biol.* 2015;25:194–9.
14. Zhu W, Ausin I, Seleznev A, Méndez-Vigo B, Picó FX, Sureshkumar S, et al.

Natural Variation Identifies ICARUS1, a Universal Gene Required for Cell Proliferation and Growth at High Temperatures in *Arabidopsis thaliana*. *PLoS Genet.* 2015;11:e1005085.

15. Lutz U, Posé D, Pfeifer M, Gundlach H, Hagmann J, Wang C, et al. Modulation of Ambient Temperature-Dependent Flowering in *Arabidopsis thaliana* by Natural Variation of FLOWERING LOCUS M. *PLoS Genet.* 2015;11:e1005588.

16. Sanchez-Bermejo E, Balasubramanian S. Natural variation involving deletion alleles of FRIGIDA modulate temperature-sensitive flowering responses in *Arabidopsis thaliana*. *Plant Cell Environ.* 2016;39:1353–65.

17. Ma D, Li X, Guo Y, Chu J, Fang S, Yan C, et al. Cryptochrome 1 interacts with PIF4 to regulate high temperature-mediated hypocotyl elongation in response to blue light. *Proc. Natl. Acad. Sci.* 2016;113:224–9.

18. Jung J-H, Domijan M, Klose C, Biswas S, Ezer D, Gao M, et al. Phytochromes function as thermosensors in *Arabidopsis*. *Science.* 2016;354:886-89.

19. Legris M, Klose C, Burgie ES, Costigliolo C, Neme M, Hiltbrunner A, et al. Phytochrome B integrates light and temperature signals in *Arabidopsis*. *Science.* 2016;354:897-900.

20. Koini MA, Alvey L, Allen T, Tilley CA, Harberd NP, Whitlam GC, et al. High Temperature-Mediated Adaptations in Plant Architecture Require the bHLH Transcription Factor PIF4. *Curr. Biol.* 2009;19:408–13.

21. Franklin KA, Lee SH, Patel D, Kumar SV, Spartz AK, Gu C, et al. Phytochrome-interacting factor 4 (PIF4) regulates auxin biosynthesis at high temperature. *Proc. Natl. Acad. Sci. U. S. A.* 2011;108:20231–5.

22. Proveniers MCG, van Zanten M. High temperature acclimation through PIF4 signaling. *Trends Plant Sci.* 2013;18:59–64.

23. Toledo-Ortiz G, Johansson H, Lee KP, Bou-Torrent J, Stewart K, Steel G, et al. The HY5-PIF Regulatory Module Coordinates Light and Temperature Control of Photosynthetic Gene Transcription. *PLoS Genet.* 2014;10:e1004416.

24. Delker C, Sonntag L, James GV, Janitza P, Ibañez C, Ziermann H, et al. The DET1-COP1-HY5 Pathway Constitutes a Multipurpose Signaling Module Regulating Plant Photomorphogenesis and Thermomorphogenesis. *Cell Rep.* 2014;9:1983–9.

25. Gangappa SN, Kumar SV. DET1 and HY5 Control PIF4-Mediated Thermosensory Elongation Growth through Distinct Mechanisms. *Cell Rep.* 2017;18:344–51.

26. McKhann HI, Camilleri C, Bérard A, Bataillon T, David JL, Reboud X, et al. Nested core collections maximizing genetic diversity in *Arabidopsis thaliana*. *Plant J.* 2004;38:193–202.

27. Delker C, Pöschl Y, Raschke A, Ullrich K, Ettingshausen S, Hauptmann V, et al. Natural Variation of Transcriptional Auxin Response Networks in *Arabidopsis thaliana*. *Plant Cell*. 2010;22:2184–200.
28. Scholl RL, May ST, Ware DH. Seed and Molecular Resources for *Arabidopsis*. *Plant Physiol*. 2000;124:1477–80.
29. Lincoln C, Britton J, Estelle M. Growth and development of the *axr1* mutants of *Arabidopsis*. *Plant Cell*. 1990;2:1071–80.
30. ImageJ: <http://imagej.nih.gov/ij/>
31. RootDetection: <http://www.labutils.de/rd.html>
32. Boyes DC, Zayed AM, Ascenzi R, McCaskill AJ, Hoffman NE, Davis KR, et al. Growth stage-based phenotypic analysis of *Arabidopsis*: a model for high throughput functional genomics in plants. *Plant Cell*. 2001;13:1499–510.
33. Porra RJ, Thompson WA, Kriedemann PE. Determination of accurate extinction coefficients and simultaneous equations for assaying chlorophylls a and b extracted with four different solvents: verification of the concentration of chlorophyll standards by atomic absorption spectroscopy. *Biochim. Biophys. Acta BBA - Bioenerg*. 1989;975:384–94.
34. R Core Team. R: A Language and Environment for Statistical Computing [Internet]. Vienna, Austria: R Foundation for Statistical Computing; 2015: <https://www.R-project.org>
35. Nicotra AB, Atkin OK, Bonser SP, Davidson AM, Finnegan EJ, Mathesius U, et al. Plant phenotypic plasticity in a changing climate. *Trends Plant Sci*. 2010;15:684–92.
36. Whitman D, Agrawal A. What is Phenotypic Plasticity and Why is it Important? *Phenotypic Plast. Insects. Science Publishers*; 2009: <http://dx.doi.org/10.1201/b10201-2>
37. Loveys BR, Atkinson LJ, Sherlock DJ, Roberts RL, Fitter AH, Atkin OK. Thermal acclimation of leaf and root respiration: an investigation comparing inherently fast- and slow-growing plant species. *Glob. Change Biol*. 2003;9:895–910.
38. Storz JF. Contrasting patterns of divergence in quantitative traits and neutral DNA markers: analysis of clinal variation. *Mol. Ecol*. 2002;11:2537–2551.
39. Leinonen T, Cano JM, Mäkinen H, Merilä J. Contrasting patterns of body shape and neutral genetic divergence in marine and lake populations of threespine sticklebacks. *J. Evol. Biol*. 2006;19:1803–1812.
40. NASC/ABRC. [https://www.arabidopsis.org/abrc/catalog/natural\\_accession\\_9.html](https://www.arabidopsis.org/abrc/catalog/natural_accession_9.html)
41. Gay L, Neubauer G, Zagalska-Neubauer M, Pons J-M, Bell DA, Crochet P-A. Speciation with gene flow in the large white-headed gulls: does selection

counterbalance introgression? *Heredity*. 2008;102:133–146.

42. Whitlock MC. Evolutionary inference from QST. *Mol. Ecol.* 2008;17:1885–1896.

43. Hegarty TW. Temperature Coefficient (Q10), Seed Germination and Other Biological Processes. *Nature*. 1973;243:305–6.

44. Atkin OK, Tjoelker MG. Thermal acclimation and the dynamic response of plant respiration to temperature. *Trends Plant Sci.* 2003;8:343–51.

45. Penfield S, MacGregor D. Temperature sensing in plants. In: Franklin K a, Wigge P a, editors. *Temperature and Plant Development*. John Wiley & Sons, Inc; 2014. p. 1–18.

46. Delker C, Quint M. Expression level polymorphisms: heritable traits shaping natural variation. *Trends Plant Sci.* 2011;16:481–8.

47. de Montaigu A, Giakountis A, Rubin M, Tóth R, Cremer F, Sokolova V, et al. Natural diversity in daily rhythms of gene expression contributes to phenotypic variation. *Proc. Natl. Acad. Sci.* 2015;112:905–10.

48. Kumar SV, Lucyshyn D, Jaeger KE, Alós E, Alvey E, Harberd NP, et al. Transcription factor PIF4 controls the thermosensory activation of flowering. *Nature*. 2012;484:242–5.

## Figure legends

Figure 1: Phenotypic profiling approach

Schematic representation of the accessions, cultivation temperatures (°C) and phenotype classes used in the phenotypic profiling approach. Numbers indicate individual traits listed in Additional file 16 and are color-coded according to the corresponding phenotype class. Blue and orange squares indicate phenotypes sorted into '*morphometric phenotypes*' and '*yield-associated phenotype*' classes, respectively. Their position is indicative for the developmental stage at time of assessment.

Figure 2: Col-0 growth and development in response to different ambient

temperatures

(a) Quantification of phenotypic traits recorded at different growth temperatures. Box plots show median and interquartile ranges (IQR), outliers ( $> 1.5$  times IQR) are shown as circles. Units for each trait are specified in Additional file 16. Different letters denote statistical differences ( $P > 0.05$ ) among samples as assessed by one-factorial ANOVA and Tukey HSD. (b) Summary of temperature effects on developmental timing. Circles denote medians, bars denote IQRs ( $n > 15$ ). Times of phenotypic assessment for selected traits in (a) are indicated by asterisks.

Figure 3: Natural variation in temperature sensitivity of phenotypic traits ( $Q_{10}$ )

Mean  $\log_2 Q_{10}$  values for each accession (a) summarized in box plots for each phenotype class and (b) presented as a heatmap for all individual phenotypes. (a) Box plots show median and interquartile ranges (IQR), whiskers range from min. to max. values. (b) positive (increasing) and negative (decreasing)  $\log_2 Q_{10}$  values are shown in yellow and blue, respectively with a  $\log_2 Q_{10}$  cut-off value of 2 for better resolution. Missing data are denoted in light gray.

Figure 4: Genotype and temperature effects on phenotypic variation

(a) Genotype ( $P_{st}^{gen}$ , black) and temperature ( $P_{st}^{temp}$ , green) contribution to variation. Solid lines show mean  $P_{st}$  values and shaded areas indicate standard deviations. (b) Scatter plot of mean  $P_{st}^{gen}$  and  $P_{st}^{temp}$  values over all temperatures and accessions, respectively. Phenotypes are color-coded according to the phenotype classes shown in Fig. 1 and described in Supporting Information Table S1. A heatmap of individual  $P_{st}^{gen}$  and  $P_{st}^{temp}$  values and a scatter plot including standard

deviations are shown in Additional file 16.

#### Figure 5: Principle component and correlation analyses

(a) Phenotypic data of all temperatures and genotypes were subjected to principle component analysis (PCA). (b-c) Correlation analysis of temperature responses among individual traits or trait groups of all analyzed genotypes (b) or in selected individual accessions (c). Spearman correlation coefficients were tested for significance and coefficients with  $P < 0.05$  and  $P < 0.1$  are presented in (b) and (c), respectively. Phenotype correlations for all accessions individually are shown in Additional file 18.

#### **Additional files**

- 582 Additional file 1: Table of recorded phenotypes and association to phenotype classes  
Additional file 2: Identity and geographic origin of analyzed *A. thaliana* accessions
- 584 Additional file 3: Reaction norm plots of each phenotype for each of the analyzed genotypes
- 586 Additional file 4: Summary of Col-0 thermomorphogenesis  
Additional file 5: Summary of Bay-0 thermomorphogenesis
- 588 Additional file 6: Summary of C24 thermomorphogenesis  
Additional file 7: Summary of Cvi-0 thermomorphogenesis
- 590 Additional file 8: Summary of Got-7 thermomorphogenesis  
Additional file 9: Summary of Ler-1 thermomorphogenesis
- 592 Additional file 10: Summary of No-0 thermomorphogenesis  
Additional file 11: Summary of Rrs-7 thermomorphogenesis

594 Additional file 12: Summary of Sha thermomorphogenesis

Additional file 13: Summary of Ws-2 thermomorphogenesis

596 Additional file 14: Natural variation in developmental timing (leaves vs. days)

Additional file 15: GxE interaction analysis results

598 Additional file 16: Detailed information on genotype and temperature effects on  
phenotypic variation

600 Additional file 17: Temperature effect on yield

Additional file 18: Correlations among temperature responses in individual

602 accessions

604

606

608

610

612

614

616

618 Figure 1

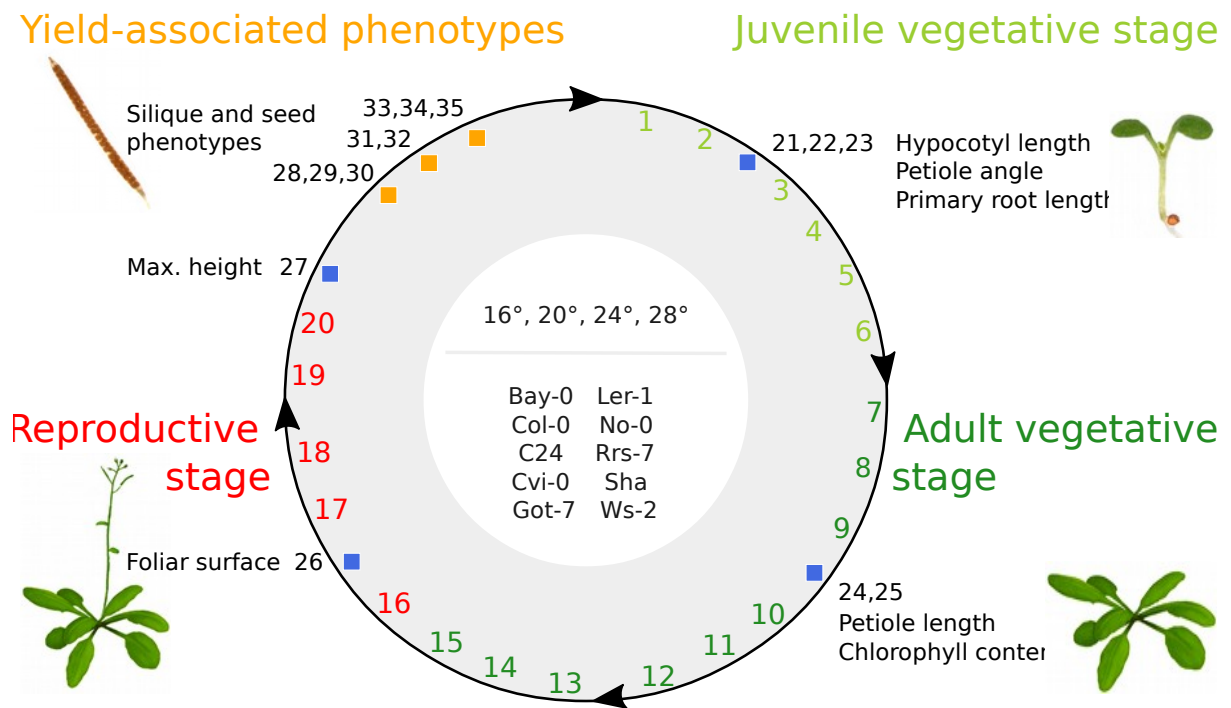

620

622

624

626

628

630



632 Figure 2

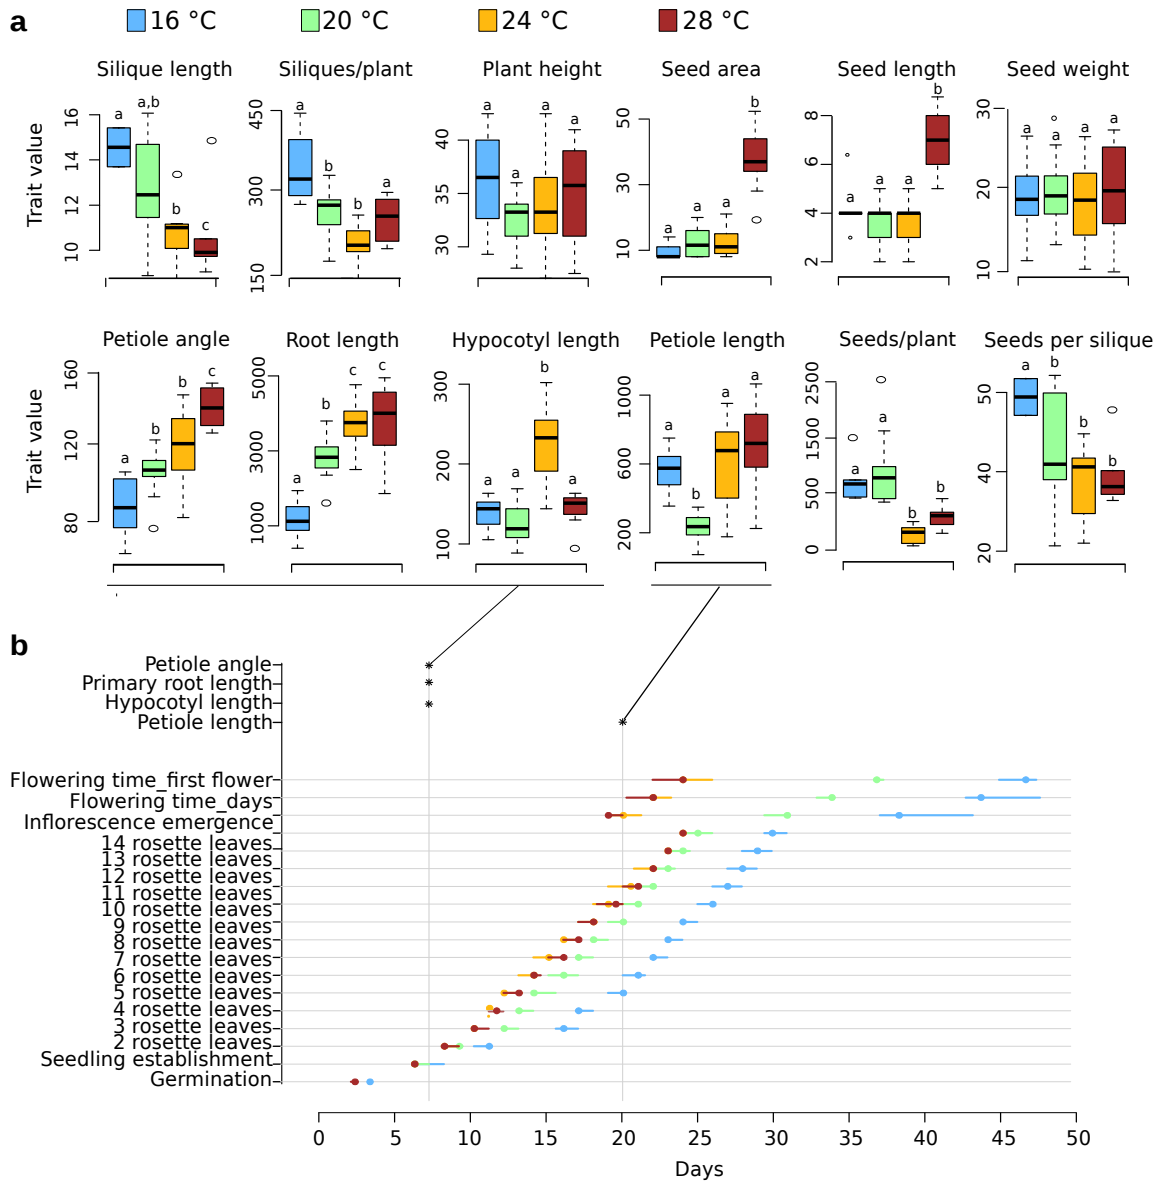

634

636

638

640 Figure 3

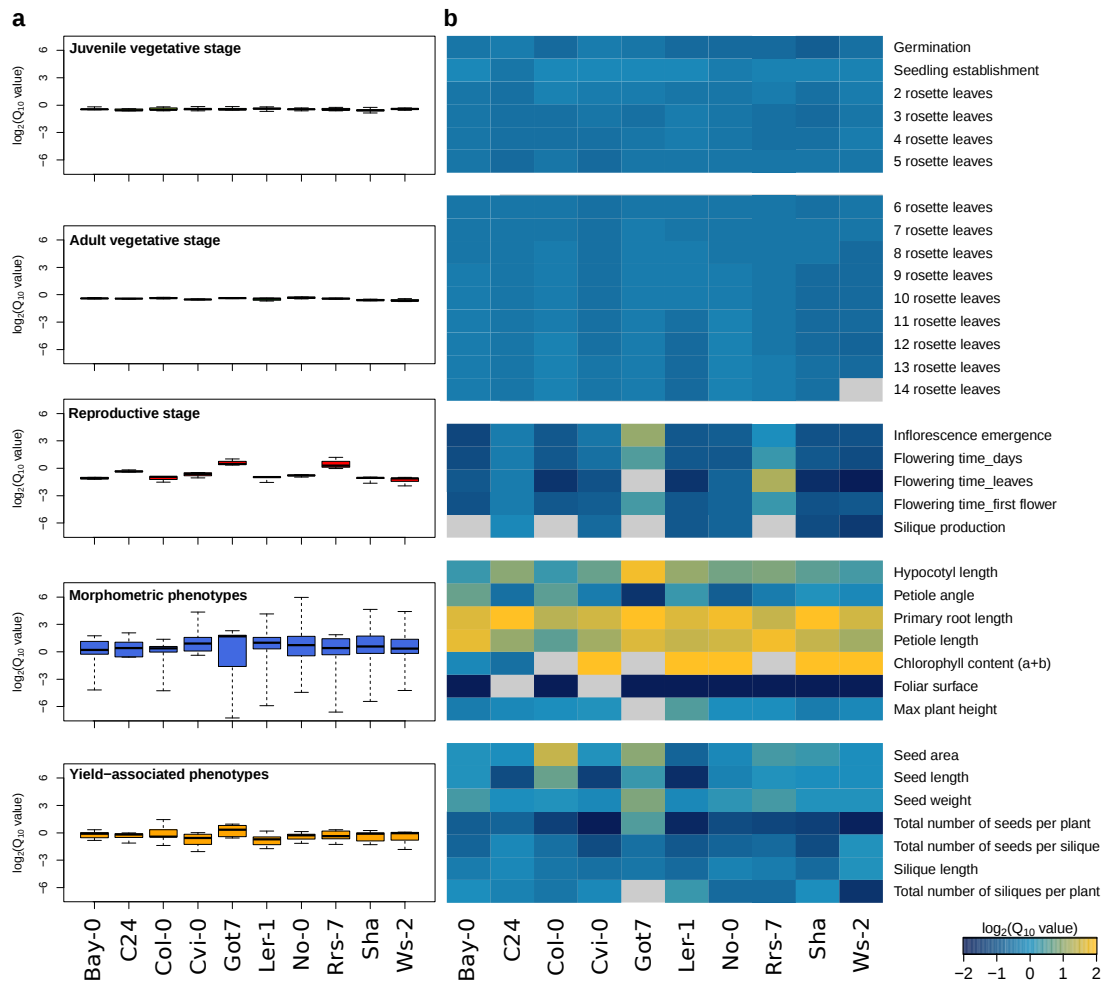

644

646

648

650 Figure 4

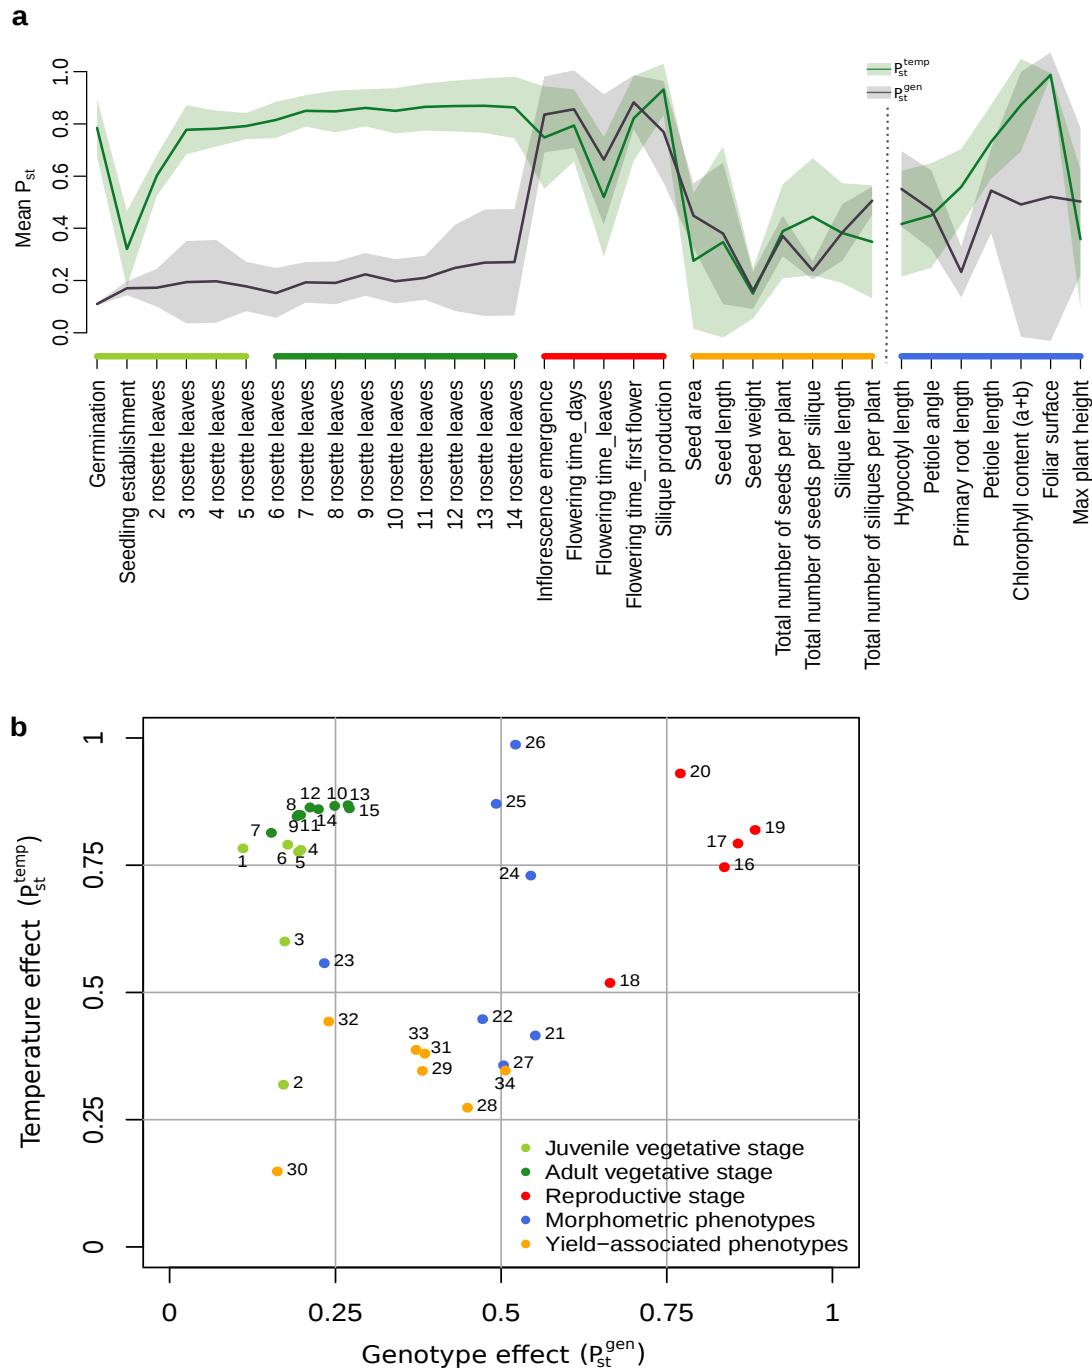

652

Figure 5

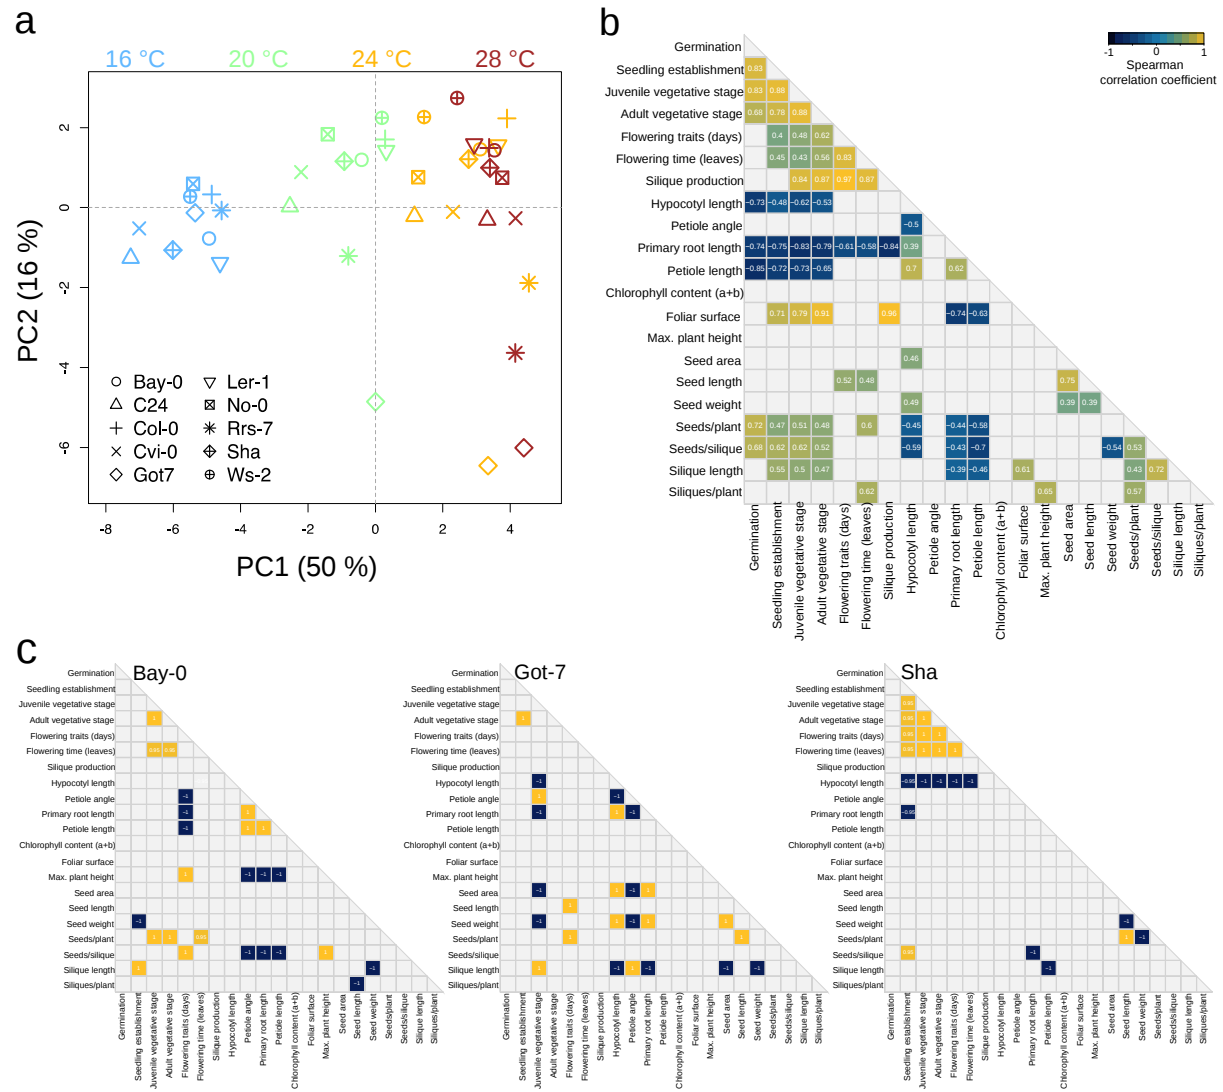

Source: http://biorxiv.org/content/10.1101/017285v3.full.pdf
